# Supplementary material for: How does heparin prevent the pH inactivation of cathepsin B? Allosteric mechanism elucidated by docking and molecular dynamics
Source: PubMed Central journal article supplement (PMC3045798; doi:10.1186/1471-2164-11-s5-s5), 2010-12-22
Supplement: 1471-2164-11-S5-S5-S1.pdf [file 1471-2164-11-S5-S5-S1.pdf]

PDB entry: 1HUC (pH 8)

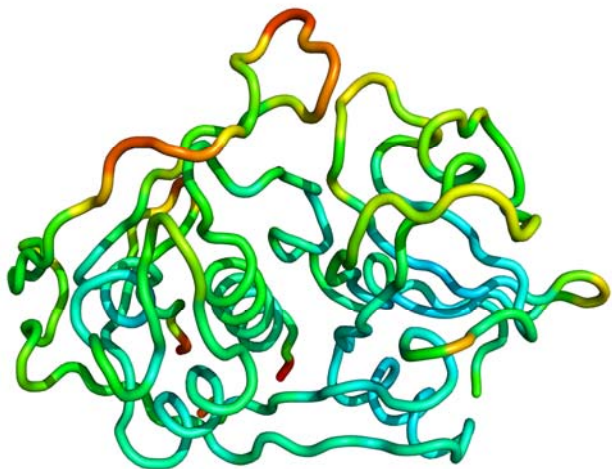

PDB entry: 1CSB (pH 8)

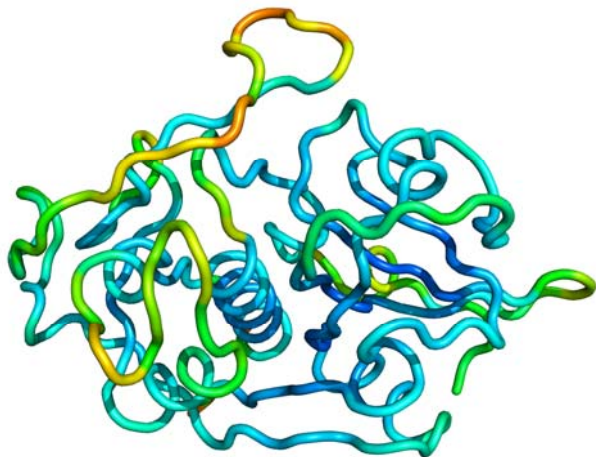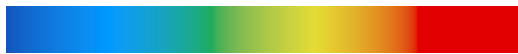

0

RMSF (Å)

5
